# Supplementary material
Source: PubMed Central journal article supplement (PMC2898609)

### **Supplementary figure legends**

Supplementary Fig. 1. CD4 and CD8 staining of thymus and peripheral T cells from a representative 3- and 6-week old wild type and PTEN- $\Delta$ T mouse. The peripheral T cells shown were isolated by magnetic bead sorting (MACS). Similar results are seen with FACS purified double positive thymocytes and peripheral CD4 T cells (not shown).

Supplementary Fig. 2. Southern blotting analysis of c-myc in (A) five PTEN- $\Delta$ T tumors and (B) T (14,15) negative tumors (OTII/PTEN- $\Delta$ T-Rag1<sup>-/-</sup> and PTEN- $\Delta$ T-TCR $\alpha$ <sup>-/-</sup> tumors).

Supplementary Fig. 3. Flow cytometric analysis of PTEN/SLP76- $\Delta$ T and PTEN- $\Delta$ T-TCR $\alpha$ <sup>-/-</sup> mice. A, Thymocytes and splenocytes from PTEN/SLP76- $\Delta$ T mice of and littermate controls aged greater than 38 weeks unless otherwise indicated were stained with indicated antibodies and analyzed by flow cytometry (representative of three mice). B. Analysis of lymphomas from PTEN $\Delta$ T-TCR $\alpha$ <sup>-/-</sup> mice and control peripheral lymphocytes from littermates over 42-week old of age (representative of three mice).

Supplementary Fig. 4. Flow cytometric analysis of primary tumor cells from indicated source and their derived immortal cell lines. Data are representative of three mice of each type of tumor.

|                  | V $\beta$ 2 | V $\beta$ 3 | V $\beta$ 4 | V $\beta$ 5 | V $\beta$ 6 | V $\beta$ 7 | V $\beta$ 8 | V $\beta$ 9 | V $\beta$ 10 | V $\beta$ 11 | V $\beta$ 12 | V $\beta$ 13 | V $\beta$ 14 |
|------------------|-------------|-------------|-------------|-------------|-------------|-------------|-------------|-------------|--------------|--------------|--------------|--------------|--------------|
| WT               | 6.31        | 7.65        | 6.65        | 4.54        | 10.9        | 3.48        | 16.1        | 1.46        | 3.89         | 7.04         | 3.09         | 1.58         | 3.23         |
| PTEN- $\Delta$ T | 5.38        | 5.81        | 5.87        | 5.38        | 8.70        | 3.39        | 19.8        | 1.67        | 2.87         | 6.74         | 4.69         | 2.52         | 3.20         |

**Supplementary table 1:** Percentage of CD4 T cells from spleen of thymectomized, aged mice expressing indicated V $\beta$ . The data are representative of four WT and six PTEN- $\Delta$ T mice.

Supplementary Fig.1

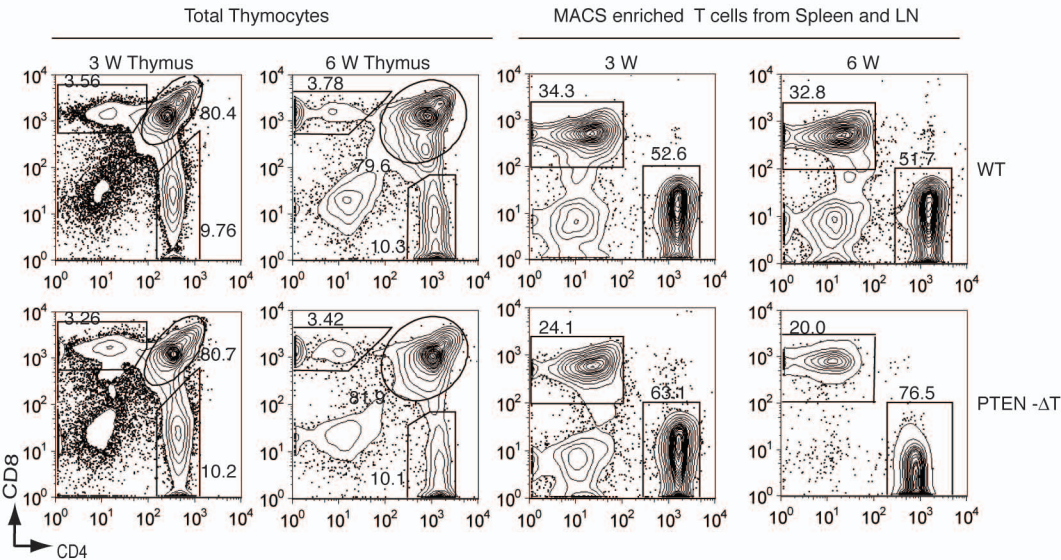

Supplementary Fig.2

**A**

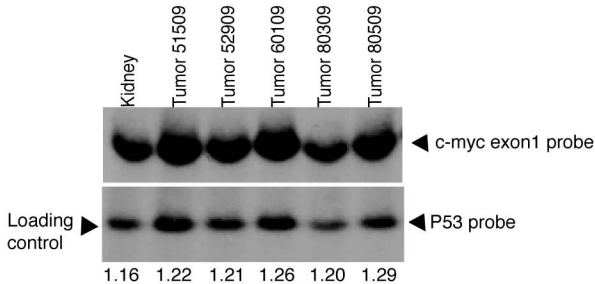

**B**

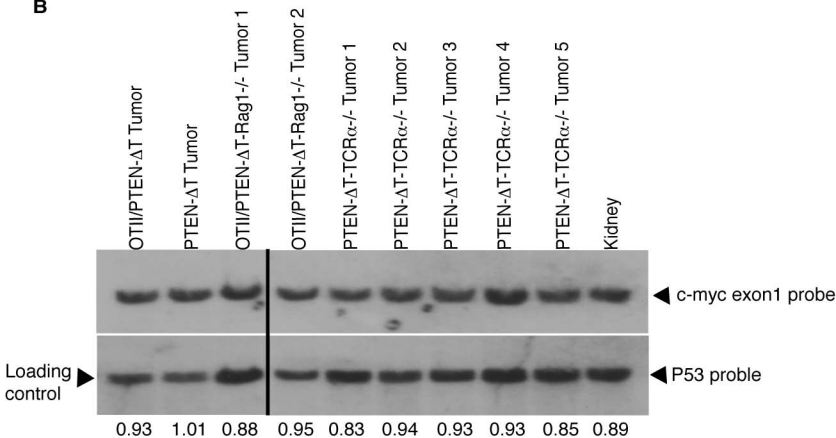

Supplementary Fig.3

A

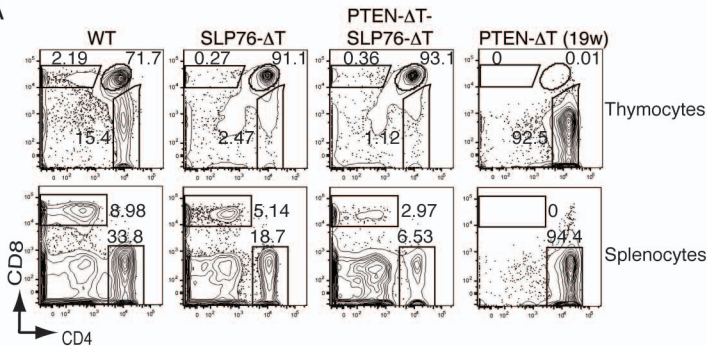

B

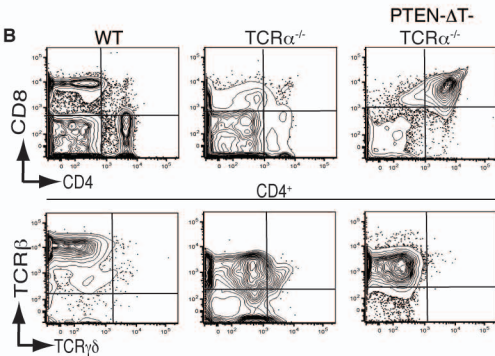

Supplementary Fig.4

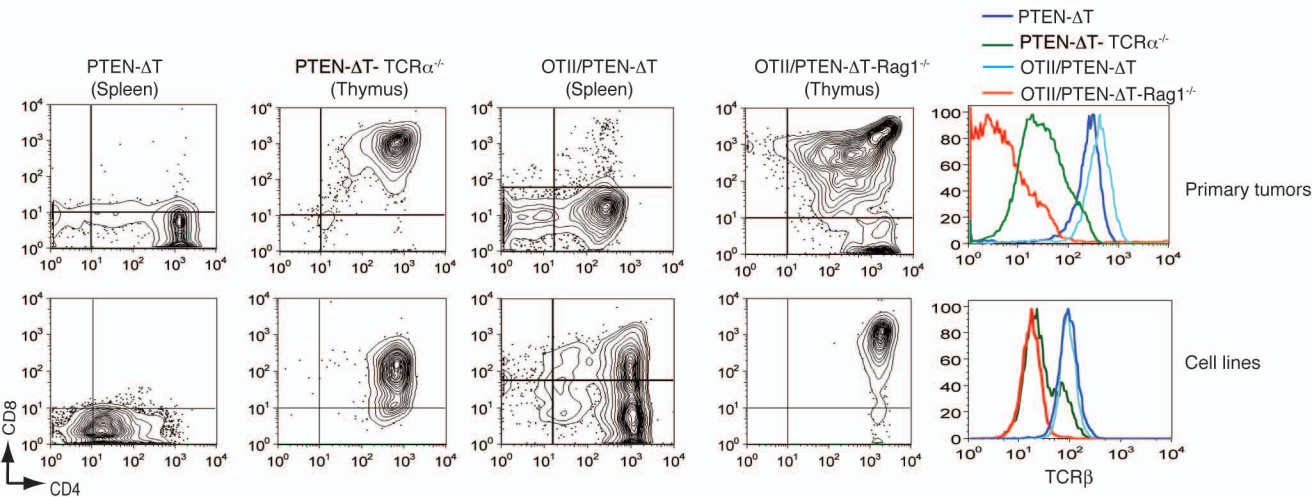

Supplement: JCI42382sd.pdf [file JCI42382sd.pdf]
